# Supplementary material for: Checkpoint and recombination pathways independently suppress rates of spontaneous homology-directed chromosomal translocations in budding yeast
Source: Front Genet. 2025 Apr 4;16:1479307. doi: 10.3389/fgene.2025.1479307 (PMC12006765; doi:10.3389/fgene.2025.1479307)
Supplement: Supplementary file 4 [file Table3.docx]

SUPPLEMENTARY TABLE 3. Interaction Factors (IF) For Selected Double Mutants.

| Genotype (Strain) | G1G2 | G1 | G2 | C | IF2. | Type of Interaction3. |
| --- | --- | --- | --- | --- | --- | --- |
| *rad9 rad51* (YB749) | 176 | 17 | 30 | 4 | 133 | Synergistic |
| *rad9 rad55* (YB753) | 226 | 17 | 33 | 4 | 180 | Synergistic |
| *rad9 rad57* (YB754) | 199 | 17 | 34 | 4 | 152 | Synergistic |
| *rad9 rad54* (YB751) | 161 | 17 | 2.8 | 4 | 145.2 | Synergistic |
| *rad9 xrs2* (YB755) | 126 | 17 | 76 | 4 | 37 | Synergistic |
| *rad9 mre11* (YB756) | 166 | 17 | 81 | 4 | 72 | Synergistic |
| *rad9 rad50* (YB750) | 54 | 17 | 63 | 4 | -22 | Inhibition |
| *mec1-21 rad51* (YB757) | 288 | 30 | 65 | 3 | 196 | Synergistic |

1. For full genotype, see Suplementary Table 1.

2. IF = G 1 G 2 – G 1 – G 2 + C (David et al., 2016) , where G1G2 is the adjusted (net) recombination rate/108 for the double mutant, G1 and G2 is the net recombination of the single mutants, and C is the recombination rate for the wild-type diploid strain. The net recombination rate/108 was calculated by subtracting the rate observed in wild type from the rate observed in the mutant and multiplying by 108.

3. If IF is positive, then the interaction is synergistic and if negative the interaction is inhibition.
